# Supplementary material
Source: publisher figshare collection journal article supplement (https://gsapubs.figshare.com/articles/dataset/_/12534941)
Supplement: Supplementary file 1 [file 1]

GSA Data Repository Item 2017144

Li, S., Yang, Z., Deng, C., He, H., Qin, H., Sun, L., Yuan, J., van Hinsbergen, D.J.J., Krijgsman, W., Dekkers, M.J., Pan, Y., and Zhu, R., 2017, Clockwise rotations recorded in redbeds from the Jinggu Basin of northwestern Indochina: GSA Bulletin, doi:10.1130/B31637.1.

**Additional files**

TABLE 1. IRM COMPONENT ANALYSIS OF REPRESENTATIVE SAMPLES FROM THE JINGGU BASIN  
(KRUIVER ET AL., 2001)

| Sample name | Formation     | Component Low   |                      | Component High  |                      |
|-------------|---------------|-----------------|----------------------|-----------------|----------------------|
|             |               | $B_{1/2L}$ (mT) | IRM contribution (%) | $B_{1/2H}$ (mT) | IRM contribution (%) |
| 1-6         | Mengyejing    | 125.9           | 13                   | 676.1           | 87                   |
| 11-3        | lower Denghei | 125.9           | 13                   | 575.4           | 87                   |
| 16-11       | upper Denghei | 125.9           | 12                   | 602.6           | 88                   |
| 30-19       | lower Mengla  | 158.5           | 8                    | 1122            | 92                   |
| 34-15       | middle Mengla | 177.8           | 9                    | 1122            | 91                   |
| 38-13       | upper Mengla  | 46.8            | 8                    | 1000            | 92                   |
| 74-5        | Sanhaogou     | 52.5            | 62                   | 501.2           | 38                   |
| 77-2        | Sanhaogou     | 45.7            | 78                   | 501.2           | 13                   |

*Note:*  $B_{1/2L}$  and  $B_{1/2H}$  are the  $B_{1/2}$  (mT) (the medium field at which half of the IRM is reached) of the low and high coercivity component. The IRM contribution (%) is the contribution of each IRM component to the total IRM.
